# Supplementary material for: Quality of life in elderly ICU survivors before the COVID-19 pandemic: a systematic review and meta-analysis of cohort studies
Source: HighWire-hosted journal article supplement (doi:10.1136/bmjopen-2020-045086), 2021-10-01
Supplement: bmjopen-2020-045086supp001_data_supplement.pdf [file bmjopen-2020-045086supp001_data_supplement.pdf]

ICU Systematic Review: Appendix

1. STUDY CHARACTERISTICS

1.1 Meta-Analysis

| First Author            | Year | Country      | Study Design         | Journal                                     | Setting                 | Min Age          | Avg. Age (SD) | % Male              | Mortality | ICU LoS (SD) | HLoS (SD)     | Severity | Raw Measure        | Follow up   | Comparison                                            | Study Quality     | Participant No. | Control No.     | Effect Size | Variance |
|-------------------------|------|--------------|----------------------|---------------------------------------------|-------------------------|------------------|---------------|---------------------|-----------|--------------|---------------|----------|--------------------|-------------|-------------------------------------------------------|-------------------|-----------------|-----------------|-------------|----------|
| Abelha <sup>39</sup>    | 2007 | Portugal     | Cohort (unspecified) | BMC Anaesthesiology                         | Surgical ICU            | 65+              |               | 61.00%              | 28.00%    |              |               |          | SF-36 <sup>*</sup> | 6 months    | ICU survivors younger than 65 years old               | M                 | 112             | 114             | -.07        | .02      |
| Ali <sup>38</sup>       | 2018 | Australia    | Prospective Cohort   | Journal of Critical Care                    | Medical-Surgical ICU    | 65+              | 73 (5)        | 80.00% <sup>a</sup> |           | 4.64 (2.32)  | 16.29 (9.28)  | .24      | EQ-5D              | 12 months   | Age-matched South Australian controls                 | H                 | 32              | 572             | .03         | .03      |
| Andersen <sup>37</sup>  | 2015 | Norway       | Retrospective Cohort | Annals of Intensive Care                    | General Hospital ICU    | 80+              | 87.4 (4)      | 69.00%              | 81.52%    | 1.9 (NR)     |               | .27      | EQ-5D              | 40.8 months | Age and sex-matched Norwegian population              | M                 | 53              | 170             | -.18        | .02      |
| De Rooij <sup>35</sup>  | 2008 | Netherlands  | Retrospective Cohort | Journal of the American Geriatric Society   | Medical-Surgical ICU    | 80+              | 81.7 (2.4)    | 51.00%              | 61.52%    | 1.29 (1.13)  |               | .21      | EQ-5D              | 44.4 months | Age-matched British population                        | M                 | 187             | 142             | -.24        | .01      |
| Eddleston <sup>34</sup> | 2000 | UK           | Prospective Cohort   | Critical Care Medicine                      | General Hospital ICU    | 65+              |               | 52.45% <sup>a</sup> |           |              |               |          | SF-36 <sup>*</sup> | 3 months    | ICU survivors younger than 65 years old               | M                 | 39              | 97              | -.21        | .04      |
| Ferrao <sup>33</sup>    | 2015 | Portugal     | Retrospective Cohort | Critical Care                               | Medical-Surgical ICU    | 66+ <sup>b</sup> |               | 26.00%              |           |              |               |          | EQ-5D              | 27.6 months | ICU survivors younger than 65 years old               | M                 | 290             | 652             | -.37        | .01      |
| Grace <sup>31</sup>     | 2007 | Australia/NZ | Retrospective Cohort | Critical Care and Resuscitation             | Mixed ICUs              | 60+              |               | NR                  | 60.00%    |              |               | .28      | EQ-5D              | 28 months   | Retrospective patient ratings for one week before ICU | L                 | 99              | 99              | -.36        | .02      |
| Hofhuis <sup>30</sup>   | 2011 | Netherlands  | Prospective Cohort   | Chest                                       | Medical-Surgical ICU    | 80+ <sup>b</sup> | 83 (3.06)     | 46.90%              | 40.83%    | 5.35 (2.29)  | 25.48 (16.04) | .25      | SF-36 <sup>*</sup> | 6 months    | Age-matched Dutch population                          | M                 | 49              | 49 <sup>c</sup> | .26         | .04      |
|                         |      |              |                      |                                             |                         |                  |               |                     |           |              |               |          |                    |             | Retrospective proxy ratings for four weeks before ICU |                   | 49              | 49              | .01         | .04      |
| Honselmann              | 2015 | Germany      | Retrospective Cohort | Journal of Critical Care (part unpublished) | Mixed ICU (unpublished) | 65+              | 75.84         | 53.00%              | 43.00%    | 2.58 (NR)    |               |          | EQ-5D              | 12 months   | ICU survivors younger than 65 years old               | N/A (unpublished) | 352             | 249             | .90         | .00      |
|                         |      |              |                      |                                             |                         |                  | 75.16         | 54.00%              | 43.00%    | 2.34         |               |          | EQ-5D              | 12 months   | Age-matched German controls                           | N/A (unpublished) | 291             | 828             | .41         | .00      |

ICU Systematic Review: Appendix

|                         |      |             |                      |                                           |                      |                  |              |                     |        |              |               |     |                    |           |                                                                                   |   |     |                   |      |     |
|-------------------------|------|-------------|----------------------|-------------------------------------------|----------------------|------------------|--------------|---------------------|--------|--------------|---------------|-----|--------------------|-----------|-----------------------------------------------------------------------------------|---|-----|-------------------|------|-----|
| Jeitziner <sup>29</sup> | 2015 | Switzerland | Retrospective Cohort | Journal of Clinical Nursing               | Medical-Surgical ICU | 65+              | 68.72 (5.39) | 73.00%              |        | 4.57 (5.81)  |               | .29 | SF-36 <sup>a</sup> | 12 months | Age matched Swiss controls; Retrospective patient ratings for one week before ICU | M | 124 | 145               | -.59 | .02 |
|                         |      |             |                      |                                           |                      |                  |              |                     |        |              |               |     |                    |           |                                                                                   |   | 124 | 135               | -.08 | .01 |
| Kaarola <sup>28</sup>   | 2006 | Finland     | Cross-Sectional      | Critical Care Medicine                    | Medical-Surgical ICU | 65+              |              | 75.00%              | 57.00% |              |               |     | EQ-5D              | 47 months | ICU survivors younger than 65 years old                                           | M | 299 | 800               | -.67 | .00 |
| Levinson <sup>26</sup>  | 2016 | Australia   | Prospective Cohort   | Internal Medicine Journal                 | Private ICU          | 80+              | 84.59 (NR)   | 58.00% <sup>a</sup> | 21.45% | 1.28 (NR)    | 12.91 (NR)    |     | SF-36 <sup>a</sup> | 24 months | Age and sex-matched Australian population                                         | H | 322 | 907               | .04  | .00 |
| Merlani <sup>25</sup>   | 2007 | Switzerland | Retrospective Cohort | Acta Anaesthesiologica Scandinavica       | Surgical ICU         | 70+              | 78 (5)       | 52.00%              | 63.00% | 3.00 (13.72) | 22.50 (93.88) | .26 | SF-36 <sup>a</sup> | 24 months | Age-matched Swiss population                                                      | M | 36  | 87                | -.23 | .04 |
| Oeyen <sup>24</sup>     | 2007 | Netherlands | Prospective Cohort   | Minerva Medica                            | Medical-Surgical ICU | 80+              | 83 (3)       | 60.00% <sup>a</sup> | 49.60% | 3.35 (2.26)  | 26.93 (27.11) | .26 | EQ-5D              | 12 months | Retrospective patient or proxy ratings for one week before ICU                    | M | 63  | 63                | -.30 | .03 |
| Sacanella <sup>23</sup> | 2011 | Spain       | Prospective Cohort   | Critical Care                             | Medical ICU          | 65+              | 73.4 (5.5)   | 57.00%              | 48.70% | 9.4 (10.20)  |               | .27 | EQ-5D              | 12 months | Retrospective patient or proxy ratings before feeling ill and requiring ICU       | M | 112 | 112               | -.49 | .02 |
| Schroder <sup>22</sup>  | 2011 | Denmark     | Cohort (unspecified) | Danish Medical Bulletin                   | Mixed ICUs           | 75+              |              | 56.00%              | 53.85% |              |               |     | SF-36 <sup>a</sup> | 12 months | Age-matched Danish population                                                     | L | 36  | 229               | -.03 | .03 |
| Sznajder <sup>21</sup>  | 2001 | France      | Prospective Cohort   | Intensive Care Medicine                   | Mixed ICUs           | 65+ <sup>b</sup> |              | 55.90% <sup>a</sup> |        |              |               |     | EQ-5D              | 6 months  | ICU survivors younger than 65 years old                                           | M | 65  | 53                | -.16 | .03 |
| Villa <sup>19</sup>     | 2016 | Spain       | Prospective Cohort   | Journal of the American Geriatric Society | Medical-Surgical ICU | 75+              | 80.8 (3.3)   | 50.00%              | 43.18% |              |               | .23 | SF-36 <sup>a</sup> | 12 months | Spanish population aged 75+                                                       | M | 54  | 1363 <sup>d</sup> | -.15 | .02 |

Table A1 Full study characteristics for all effect sizes included in the meta-analysis

<sup>a</sup> Reported for study level only

<sup>b</sup> Combined elderly groups

<sup>c</sup> Assumed N based on matched sample

<sup>d</sup> Retrieved from López-García, E., Banegas, J. R., Graciani, A. P. R., Gutiérrez-Fisac, J. L., Alonso, J., & Rodríguez-Artalejo, F. (2003). Population-based reference values for the Spanish version of the SF-36 Health Survey in the elderly. *Medicina clinica*, 120(15), 568-573; a follow-up to the previous study, which was unavailable

<sup>e</sup> Unless specified, we do not report data where it is not representative of at least 66.67% of the included sample

<sup>f</sup> Abbreviations: Avg. Age (average age); ICU LoS (average length of stay in intensive care; days); HLoS (average length of stay in hospital; days); SD (standard deviation; sometimes estimated- see methods)

ICU Systematic Review: Appendix

NOTE: If studies are reported in duplicate, for the second row, assume blank cells are the same value as the row above, unless otherwise specified.

1.2 Qualitative Only Studies

| First Author     | Year | Country  | Study Design         | Journal                        | Setting              | Min Age | Participant No. | Avg. Age (SD) | % Male | ICU LoS (SD) | HLoS (SD)     | Severity | Ineligible Measure              | Follow up                                 | Comparison                                                                                |
|------------------|------|----------|----------------------|--------------------------------|----------------------|---------|-----------------|---------------|--------|--------------|---------------|----------|---------------------------------|-------------------------------------------|-------------------------------------------------------------------------------------------|
| Cuthbertson      | 2010 | Scotland | Prospective Cohort   | Critical Care                  | Medical-Surgical ICU | 65+     | 116             |               |        |              |               |          | SF-36 (MCS/PCS only)            | 12 months (paper reports up to 60 months) | ICU survivors younger than 65 years old AND retrospective ratings for a period before ICU |
| Garrouste-Orgeas | 2006 | France   | Prospective Cohort   | Intensive Care Medicine        | Medical ICU          | 80+     | 28              | 84 (3.92)     |        | 12.6 (15.5)  |               | .28      | Nottingham Health Profile (NHP) | 12 months                                 | Age and sex-matched French population controls                                            |
| Kleinpell        | 2002 | USA      | Retrospective Cohort | Research in Nursing and Health | Mixed ICUs           | 66+     | 128             |               | 42.00% | 4.2 (6.17)   | 10.28 (9.63)  | .18      | Quality of Life Index (QLI)     | 4-6 months                                | ICU survivors aged between 45 and 64 years old                                            |
| Tabah            | 2010 | France   | Prospective Cohort   | Critical Care                  | Medical-Surgical ICU | 80+     | 23              | 84 (3)        | 73.90% | 5.72 (4.74)  | 18.08 (15.01) | .23      | WHO-QOL-BREF                    | 16 months                                 | Age and sex-matched French population controls                                            |

**Table A2** Full study characteristics of all records that were only included in the qualitative synthesis

<sup>a</sup> Reported for study level only

<sup>b</sup> Abbreviations: Avg. Age (average age); ICU LoS (average length of stay in intensive care; days); HLoS (average length of stay in hospital; days), SD (standard deviation; sometimes estimated- see methods)

<sup>c</sup> Unless specified, we do not report data where it is not representative of at least 66.67% of the included sample.

ICU Systematic Review: Appendix

2. SENSITIVITY ANALYSES FOR INFLUENTIAL CASES

2.1 Overview of Outliers: Meta-Analysis

| Comparison | k  | First Author | Cook’s Distance<br>(Critical d) | Leave out Effect Size | Leave out P value | I <sup>2</sup> Change | Effect Size Change |
|------------|----|--------------|---------------------------------|-----------------------|-------------------|-----------------------|--------------------|
| Community  | 11 | Pavoni       | .97 (.36)                       | -1.97                 | .27               | -12%                  | +1.74              |
| Community  | 10 | Honselmann   | .56 (.40)                       | -.13                  | .10               | -21%                  | +.08               |

**Table A3** A summary of cases that fit our criteria as potentially influential  
<sup>a</sup> Excluded cases are highlighted in red

| First Author | Year | Country | Study Design       | Journal                                | Setting    | Min Age | Participant No. | Avg. Age (SD)             | % Male              | ICU LoS (SD)             | HLoS (SD)                 | Severity         | Mortality        | Follow up | Comparison                                          |
|--------------|------|---------|--------------------|----------------------------------------|------------|---------|-----------------|---------------------------|---------------------|--------------------------|---------------------------|------------------|------------------|-----------|-----------------------------------------------------|
| Pavoni       | 2012 | Italy   | Prospective Cohort | Archives of Gerontology and Geriatrics | Mixed ICUs | 80+     | 143             | 86.51 <sup>a</sup> (1.81) | 26.74% <sup>a</sup> | 5.27 <sup>a</sup> (5.80) | 14.20 <sup>a</sup> (8.96) | .20 <sup>a</sup> | 50% <sup>a</sup> | 12 months | Age-matched Italian retirement community population |

**Table A4** Study characteristics of the lone study excluded as an outlier  
<sup>a</sup> Reported for study level only  
<sup>b</sup> Abbreviations: Avg. Age (average age); ICU LoS (average length of stay in intensive care; days); HLoS (average length of stay in hospital; days), SD (standard deviation; sometimes estimated- see methods)

## ICU Systematic Review: Appendix

### 3. QUALITATIVE SYNTHESIS

#### 3.1 Qualitative analysis procedure

| Scale        | Mental Health Subscale(s)                                   | Physical Health Subscale(s)                                      | Additional Notes               |
|--------------|-------------------------------------------------------------|------------------------------------------------------------------|--------------------------------|
| EQ-5D        | Anxiety/Depression                                          | Mobility, Self-Care, Usual Activities, Pain/Discomfort           | Raw scores scaled between 1-3  |
| SF-36        | Social Functioning, Role Emotional, Mental Health, Vitality | Physical Functioning, Bodily Pain, General Health, Role Physical |                                |
| NHP          | Sleep, Emotional Reaction, Social Isolation                 | Pain, Energy, Physical Mobility                                  | Reverse scoring                |
| WHO-QOL-BREF | Psychological Health, Social Relationships                  | Overall perception of Health, Physical Health, Environment       |                                |
| QLI          | Socio-economic, Family, Psychological/Spiritual             | Health and Functioning                                           | Raw scores scaled between 0-30 |

**Table A5** Subscales used to estimate mental and physical health QoL within the qualitative synthesis

ICU Systematic Review: Appendix

4. SENSITIVITY ANALYSES FOR OBSERVED EFFECTS

4.1 Forest Plots

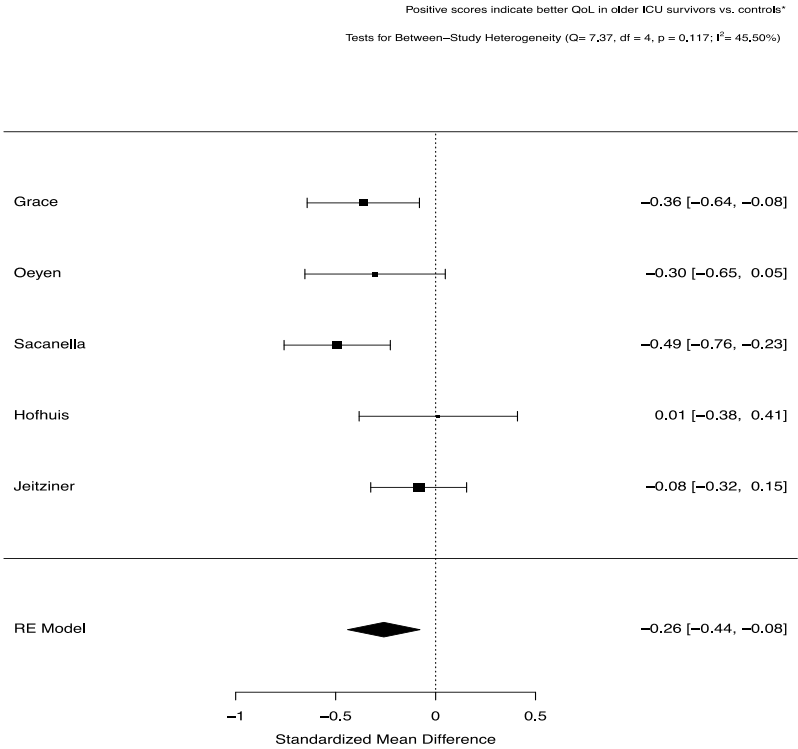

Fig. A1 Forest plot of differences in EQ-5D composite scores in elderly survivors, comparing pre-ICU and post-ICU scores

ICU Systematic Review: Appendix

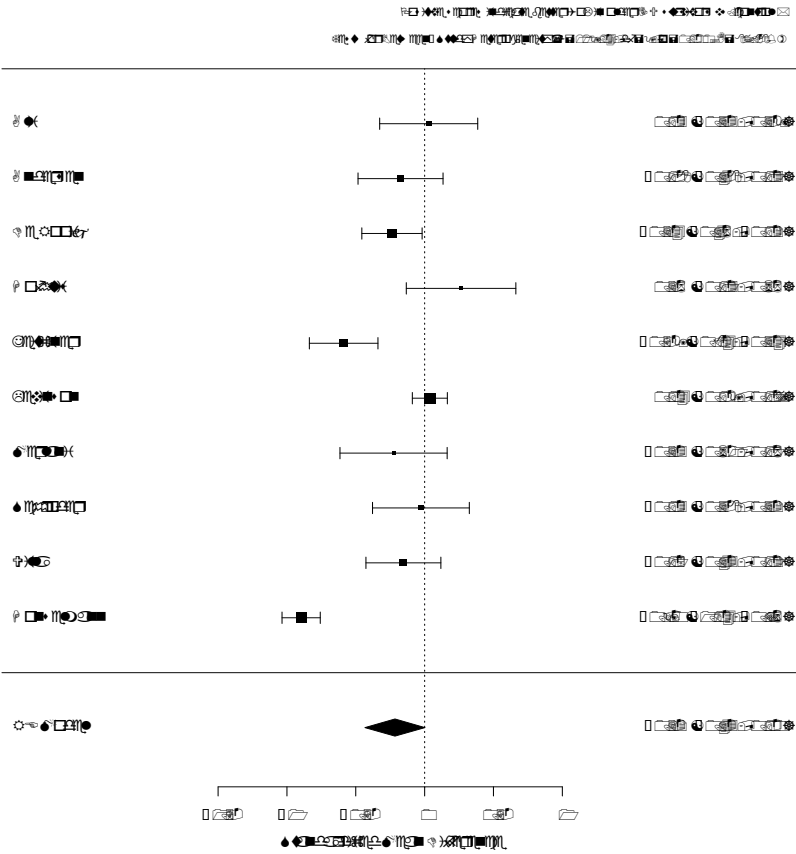

**Fig. A2** Forest plot of differences in EQ-5D composite scores, comparing elderly ICU survivors at follow-up and age-matched community controls

ICU Systematic Review: Appendix

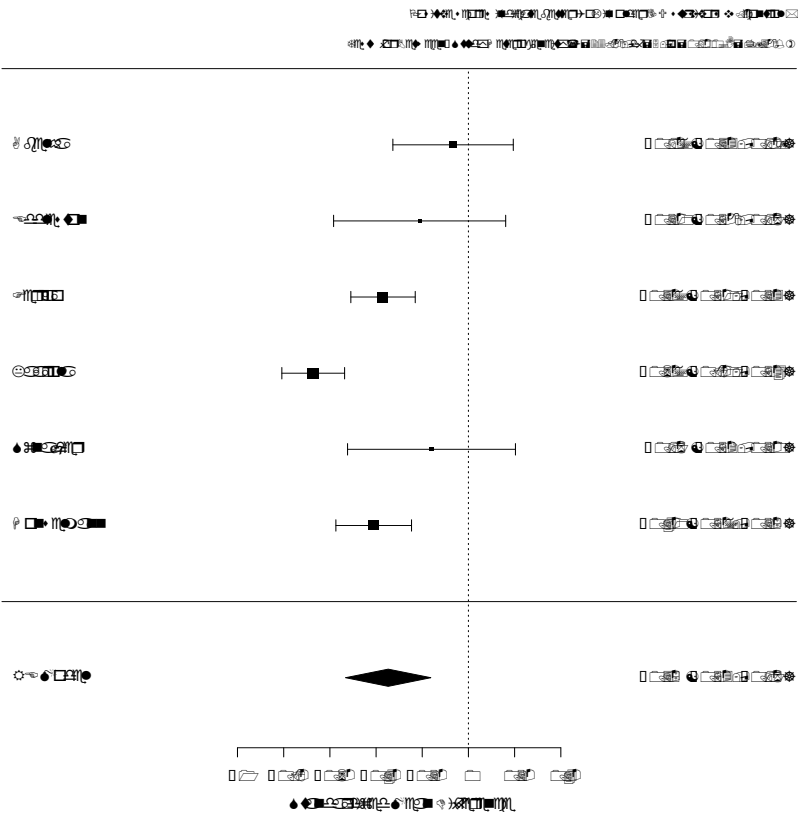

**Fig. A3** Forest plot of differences in EQ-5D composite scores at follow-up, comparing elderly ICU survivors (aged 65+) and younger ICU survivors (aged under 65), both at follow-up

## Appendix: Disparity or Discrimination?

A systematic review of socio-demographic associations of insight

## 4.2 Funnel Plots

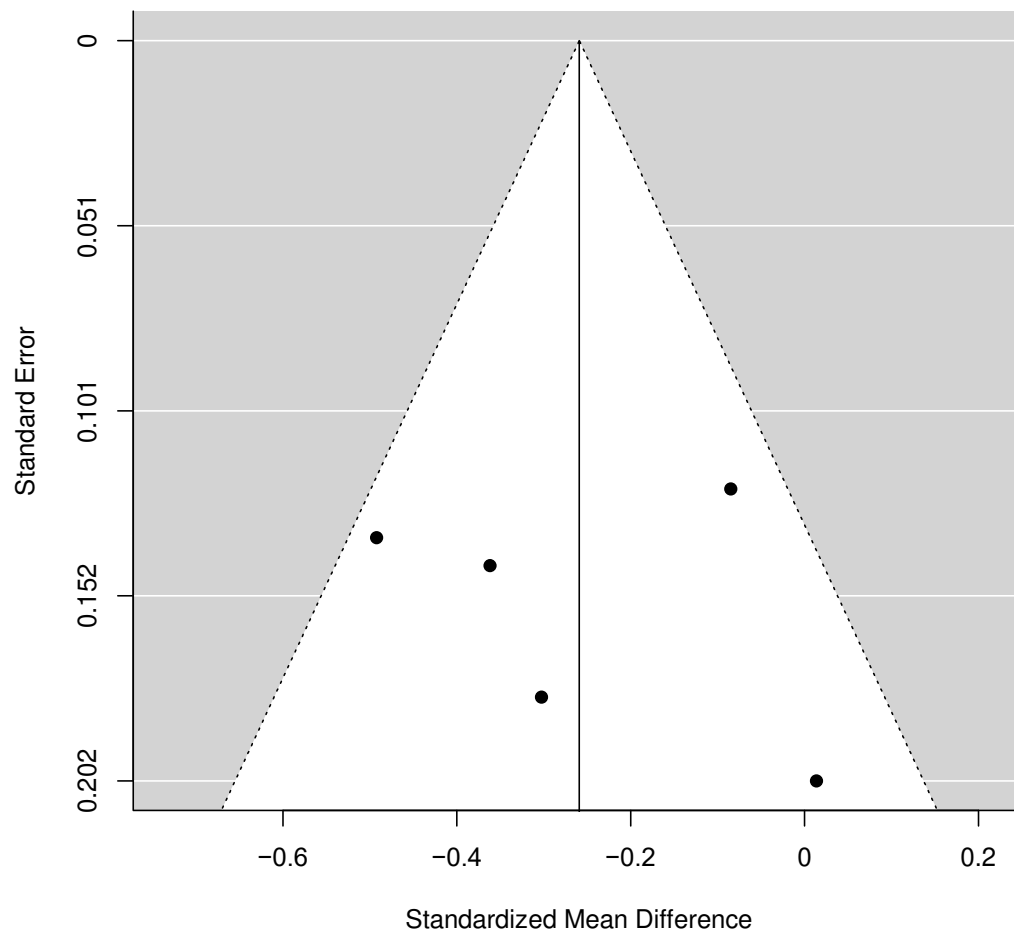

**Fig. A4** Funnel plot of studies that investigated differences in EQ-5D composite scores in elderly survivors, comparing pre-ICU and post-ICU scores

## Appendix: Disparity or Discrimination?

A systematic review of socio-demographic associations of insight

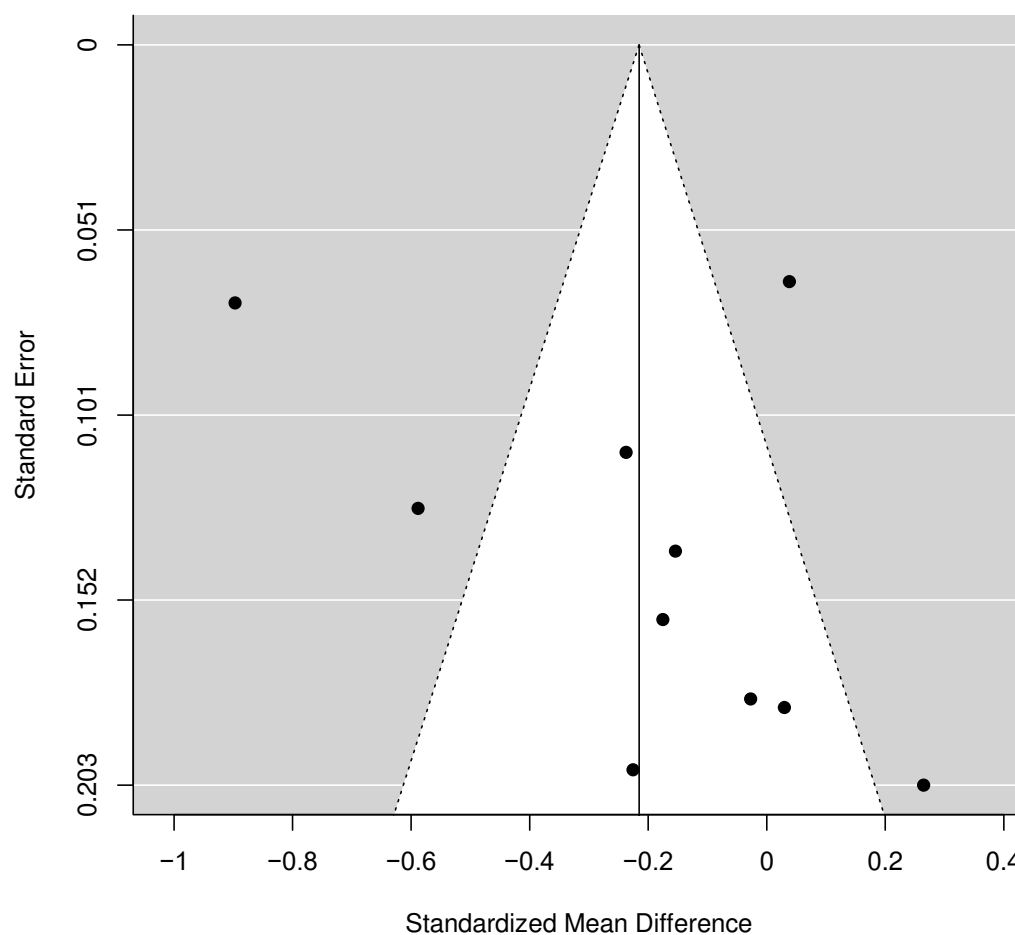

**Fig. A5** Funnel plot of studies that compared EQ-5D scores in elderly ICU survivors at follow-up and age-matched community controls

Appendix: Disparity or Discrimination?  
A systematic review of socio-demographic associations of insight

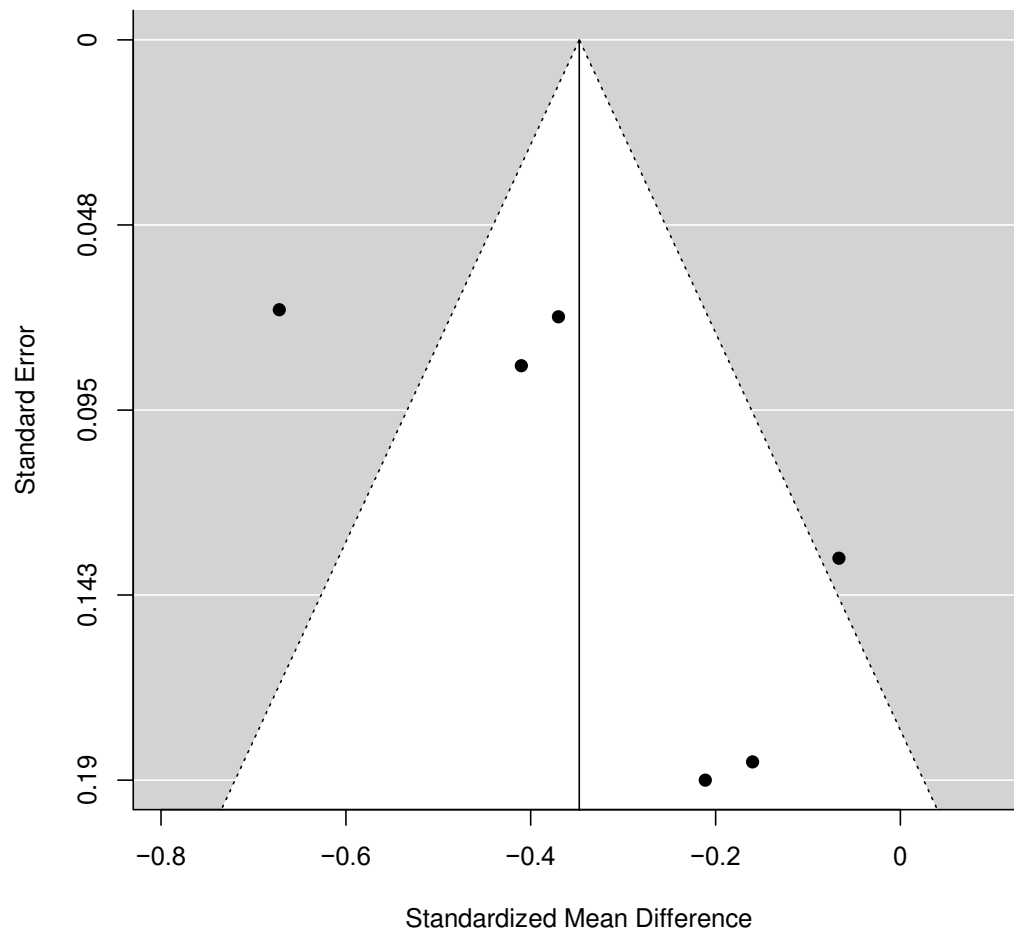

**Fig. A6** Funnel plot of studies that compared EQ-5D scores in elderly ICU survivors (aged 65+) and younger ICU survivors (aged under 65), both at follow-up

Appendix: Disparity or Discrimination?  
A systematic review of socio-demographic associations of insight

4.3 Cook's Distance Plots

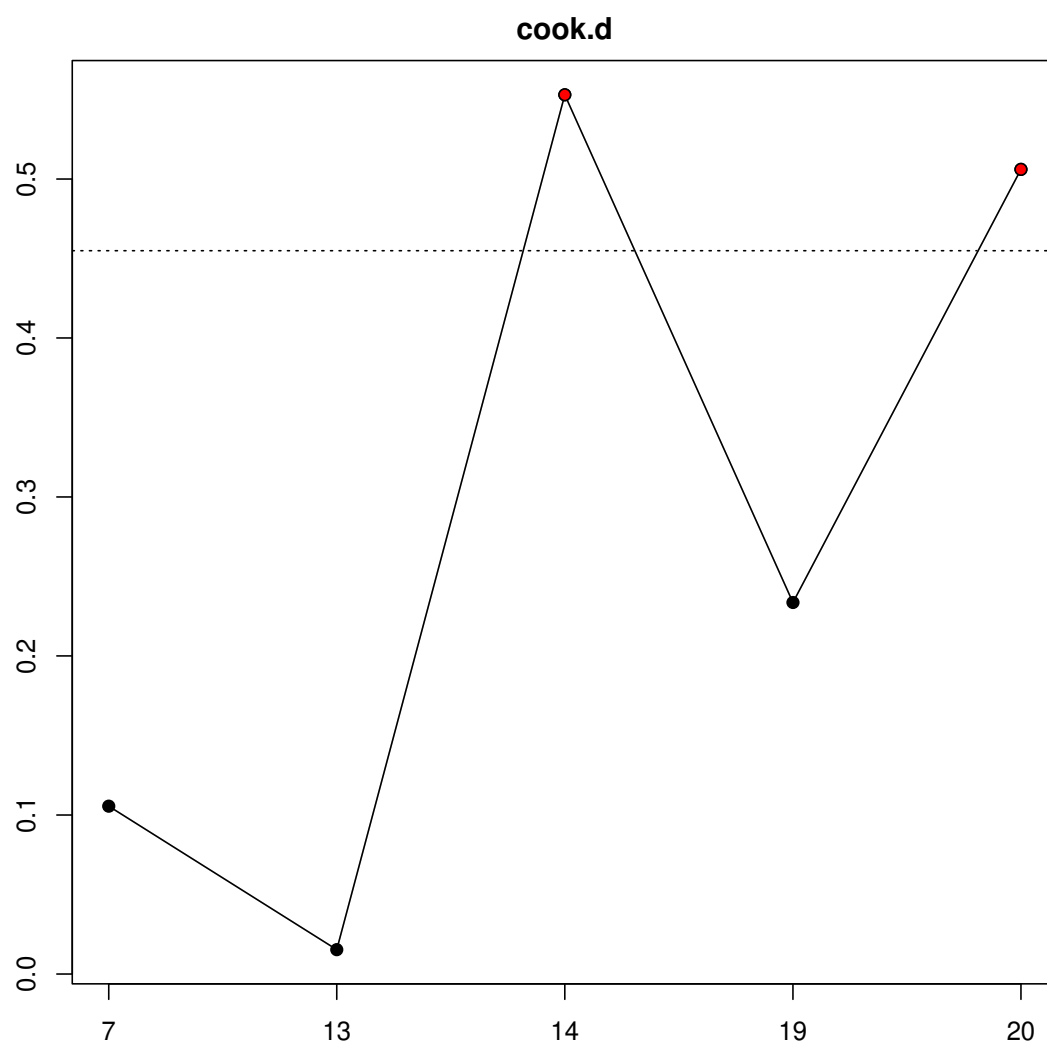

**Fig. A7** Cook's distance plot of studies that investigated differences in EQ-5D composite scores in elderly survivors, comparing pre-ICU and post-ICU scores

Appendix: Disparity or Discrimination?  
A systematic review of socio-demographic associations of insight

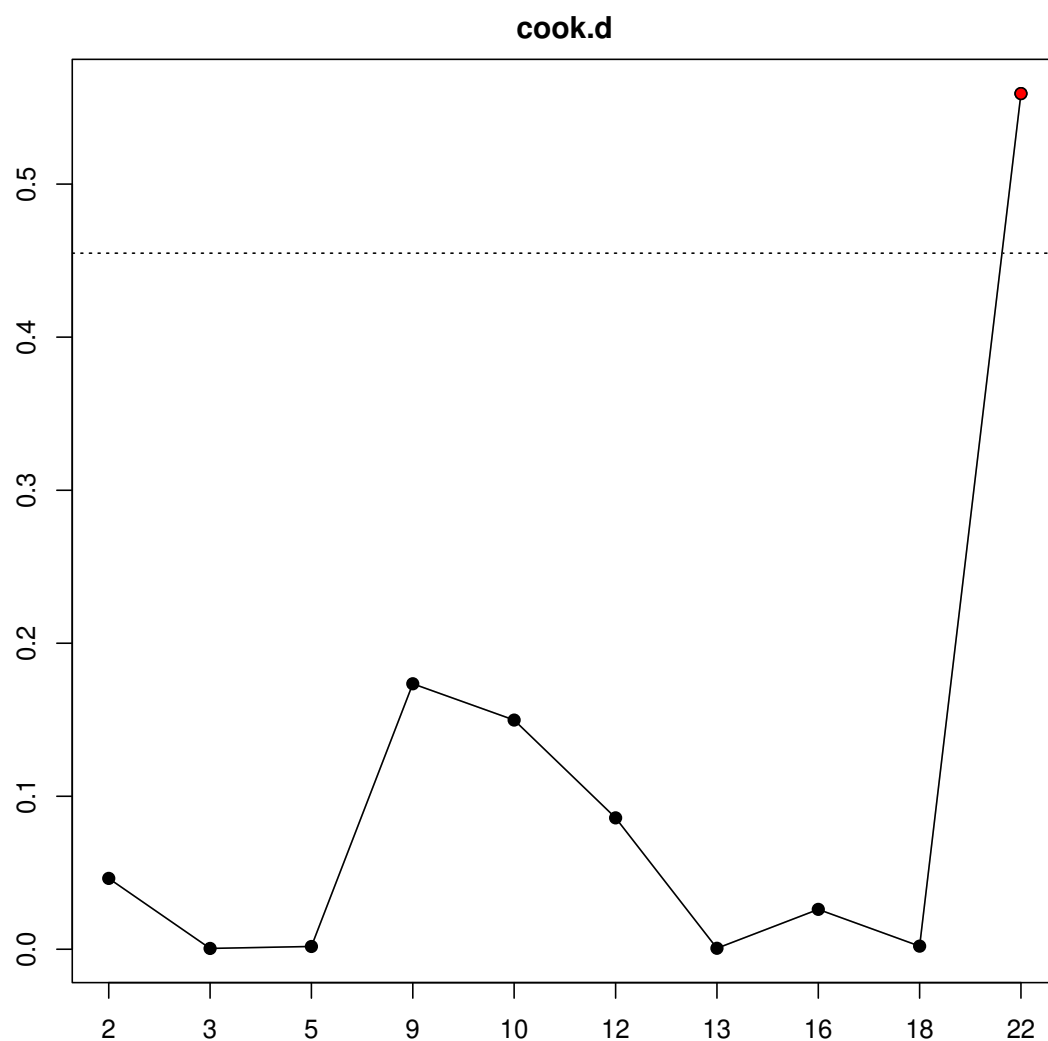

**Fig. A8** Cook's distance plot of studies that compared EQ-5D scores in elderly ICU survivors at follow-up and age-matched community controls

Appendix: Disparity or Discrimination?  
A systematic review of socio-demographic associations of insight

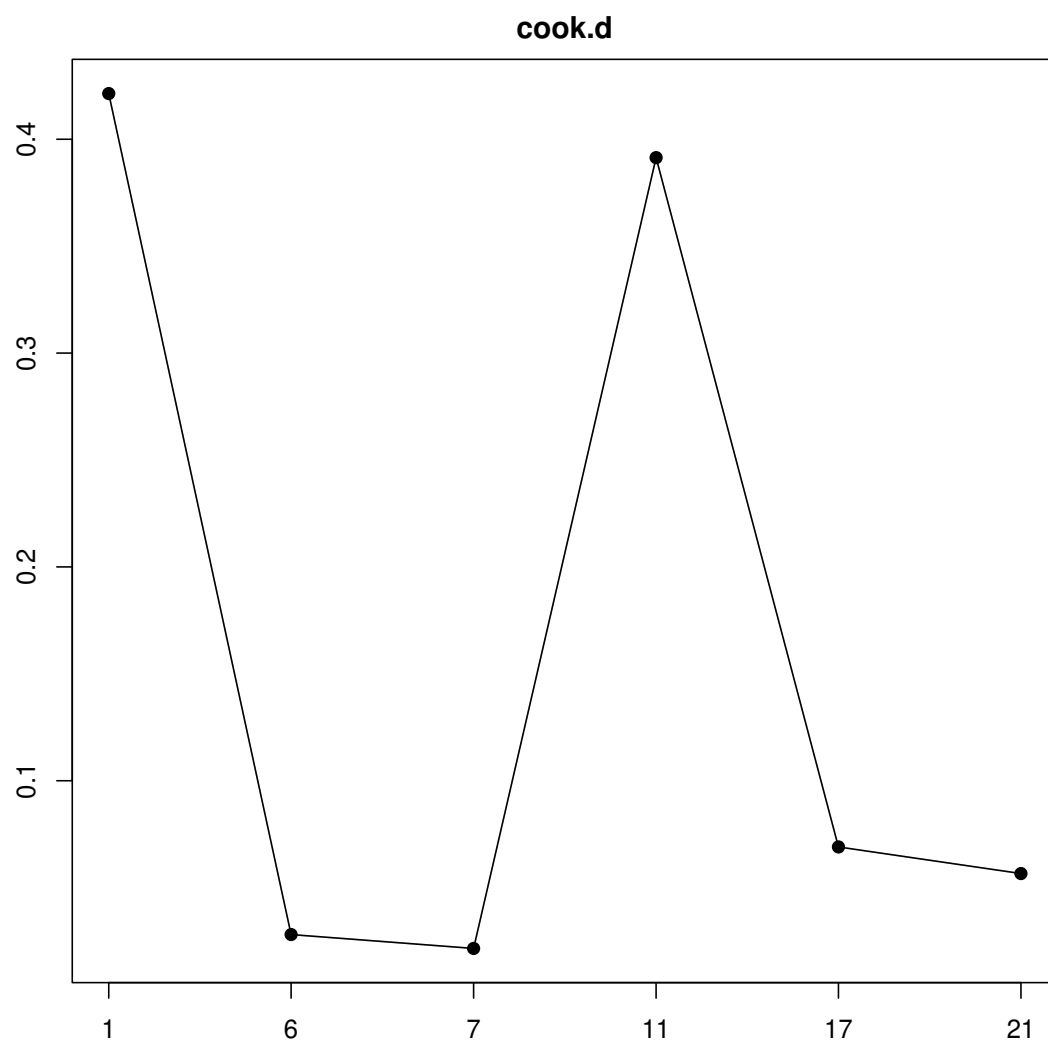

**Fig. A9** Cook's distance plot of studies that compared EQ-5D scores in elderly ICU survivors (aged 65+) and younger ICU survivors (aged under 65), both at follow-up

## Appendix: Disparity or Discrimination?

A systematic review of socio-demographic associations of insight

**5. REVIEW PROTOCOL****5.1 ICU Review Protocol**

| Included                                                                                                                                                                                    | Excluded                                                                       |
|---------------------------------------------------------------------------------------------------------------------------------------------------------------------------------------------|--------------------------------------------------------------------------------|
| Design                                                                                                                                                                                      |                                                                                |
| Case note analyses (longitudinal)                                                                                                                                                           | Qualitative only studies                                                       |
| Case control                                                                                                                                                                                | Systematic review or meta-analysis (categorise in separate folder)             |
| Retrospective cohort                                                                                                                                                                        | Narrative review                                                               |
| Prospective cohort                                                                                                                                                                          | Non-English language (if translation can't be found)                           |
| Unpublished dissertations of the above                                                                                                                                                      | Commentaries                                                                   |
|                                                                                                                                                                                             | Case studies                                                                   |
|                                                                                                                                                                                             | Small N samples (<20 eligible participants)                                    |
|                                                                                                                                                                                             | Conference abstracts                                                           |
|                                                                                                                                                                                             | Brief reports                                                                  |
|                                                                                                                                                                                             | Books                                                                          |
| Population                                                                                                                                                                                  |                                                                                |
| Patients aged 60+ who have undergone ICU                                                                                                                                                    | <20 eligible patients aged 60+                                                 |
| Medical, Surgical or Mixed ICU settings                                                                                                                                                     | Veteran, trauma or emergency care setting                                      |
|                                                                                                                                                                                             | Non-OECD country                                                               |
|                                                                                                                                                                                             | Non-human participants                                                         |
|                                                                                                                                                                                             | Palliative care                                                                |
|                                                                                                                                                                                             | Non-ICU patients                                                               |
| Focus                                                                                                                                                                                       |                                                                                |
| Patients aged 60+ who have undergone ICU                                                                                                                                                    | Neurological ICU patients only                                                 |
| Follow up of at least 3 months                                                                                                                                                              | Cardiosurgical ICU patients only                                               |
| At least one of the following comparison groups:                                                                                                                                            | No follow up/Follow up less than three months                                  |
| <ul style="list-style-type: none"> <li>Age-matched community controls</li> <li>Scores taken before ICU</li> <li>Younger ICU patients</li> </ul>                                             | No comparison group                                                            |
| QoL at follow up measured by patients (carers may help but cannot do assessment on their own)                                                                                               | QoL at follow up all measured by proxy (ie. doctors or carers)                 |
| Data/Outcomes                                                                                                                                                                               |                                                                                |
| Validated QoL measure (EQ-5D, SF-36, NHP, WHOQOLBREF, QLI or variants of these)                                                                                                             | Non-validated QoL measure only (eg. a simple question of whether QoL improved) |
| QoL summary score reported in paper for both groups, or:                                                                                                                                    | No eligible data on QoL (or insufficient data to calculate summary scores)     |
| <ul style="list-style-type: none"> <li>Subscores can be used to calculate summary scores</li> <li>Study references data for age-matched control that is fully reported elsewhere</li> </ul> | QoL not reported for both groups (regression analyses do not count)            |

## Appendix: Disparity or Discrimination?

A systematic review of socio-demographic associations of insight

**6. REVIEW SEARCH TERMS****6.1 MEDLINE**

((("intensive care"[title/abstract] OR "critical care"[title/abstract] OR "critical illness"[title/abstract] OR "Respiratory Distress Syndrome"[title/abstract] OR "Sepsis"[title/abstract] OR intensive care[MeSH Terms] OR critical care[MeSH Terms] OR "critical illness"[MeSH Terms] OR "Sepsis"[MeSH Terms]))

AND ((("elderly"[title/abstract] OR "older adult"[title/abstract] OR "geriatr\*" [title/abstract] OR "dement\*" [title/abstract] OR "Alzheimer\*" [title/abstract] OR "parkinson's disease"[title/abstract] OR elderly [MeSH Terms] OR older adult\*[MeSH Terms] OR geriatr\*[MeSH Terms] OR dement\*[MeSH Terms] OR septugenaria\*[All Fields] OR octogenaria\*[All Fields] OR nonagenaria\*[All Fields] OR "over 5\*" [title/abstract] OR "over 6\*" [title/abstract] OR "over 7\*" [title/abstract] OR "over 8\*" [title/abstract] OR "over 9\*" [title/abstract] OR "over 5\*" [title/abstract] OR "over 6\*" [title/abstract] OR "over 7\*" [title/abstract] OR "over 8\*" [title/abstract] OR "over 9\*" [title/abstract]))

AND ((("quality of life"[title/abstract] OR "EuroQol\*" [All Fields] OR "Nottingham Health Profile"[All Fields] OR "NHP\*" [All Fields] OR "SF-36" [All Fields] OR "RAND-36\*" [All Fields]))

Filters: English Language, Humans, 01/01/2000 to 23/04/2020

**6.2 Cochrane Database for Systematic Reviews & Cochrane Controlled Register of Trials (CENTRAL)**

#1 ("intensive care" OR "critical care" OR "critical illness" OR "Respiratory Distress Syndrome" OR "Sepsis");ti,ab,kw  
 #2 ("elderly" OR "older adult\*" OR "geriatr\*" OR "dement\*" OR "Alzheimer\*" OR "parkinson's disease");ti,ab,kw  
 #3 (critical care OR critical illness OR Sepsis)  
 #4 (Aged OR geriatrics OR dementia)  
 #5 ("quality of life")  
 #6 ("EuroQol" OR "Nottingham Health Profile" OR "NHP" OR "SF-36" OR "RAND-36")  
 #7 MeSH descriptor: [Aged]  
 #8 MeSH descriptor: [Geriatrics]  
 #9 MeSH descriptor: [Dementia]  
 #10 MeSH descriptor: [Critical Care]  
 #11 MeSH descriptor: [Critical Illness]  
 #12 MeSH descriptor: [Sepsis]  
 #13 #1 OR #3 OR #10 OR #11 OR #12  
 #14 #2 OR #4 OR #7 OR #8 OR #9  
 #15 #5 AND #6  
 #16 #13 AND #14 AND #15= 124 (78 reviews, 36 trials).

**6.3 Web of Science**

Indexes = SCI-EXPANDED, SSCI, CPCI-S, CPCI-SHH, ESCI. **LANGUAGE** = English, **DOCUMENT TYPES** = (Article OR Abstract of Published Item), Timespan = All years (2000-2020)

#1 ALL=("intensive care" OR "critical care" OR "critical illness" OR "Respiratory Distress Syndrome" OR "Sepsis" OR "ICU")  
 #2 ALL=("elderly" OR "older adult\*" OR "geriatr\*" OR "dement\*" OR "Alzheimer\*" OR "parkinson's disease")  
 #3 ALL= ("quality of life" OR "EuroQol" OR "Nottingham Health Profile" OR "NHP" OR "SF-36" OR "RAND-36")  
 #4 #1 AND #2 AND #3  
 #5 #4 AND **LANGUAGE**: (English) AND **DOCUMENT TYPES**: (Article OR Abstract of Published Item) AND **Timespan**= 2000-2020

## Appendix: Disparity or Discrimination?

### A systematic review of socio-demographic associations of insight

#### 6.4 EMBASE (& EMBASE Classic)

Dates: 2000-2020, Limits: Human participants only, English language, Articles only

#1 All Field: "intensive care" or "critical care" or "critical illness" or "Respiratory Distress Syndrome" or Sepsis or "ICU"

#2 Text Word: elderly or "older adult\*" or "geriatr\*" or "dement\*" or "Alzheimer\*" or "parkinson\*"

#3 All Field: "quality of life" or EuroQol or Nottingham Health Profile or NHP or SF-36 OR RAND-36

#### 6.5 CINAHL

Limits: English language only, Human participants, All adult, Peer-reviewed, Jan 2000 – April 2020

#1 TX: "intensive care" or "critical care" or "critical illness" or "Respiratory Distress Syndrome" or Sepsis or "ICU"

#2: SU: "Intensive Care Units" or "Intensive Care Units or Neonatal" or "Critical Care Nursing" or "Respiratory Distress Syndrome" or Acute or "Neonatal Intensive Care Nursing" or "Critical Care or Critical Path" or "Canadian Association of Critical Care Nurses" or "British Association of Critical Care Nurses" or "ventilator patients"

#3: TX: elderly or "older adult\*" or "geriatr\*" or "dement\*" or "Alzheimer\*" or "parkinson\*"

#4: SU: "Older Adult Care (Saba CCC)" or "Frail Elderly" or "elderly patients" or "ventilator patients"

#5: TX: "quality of life" or EuroQol or "Nottingham Health Profile" or NHP or SF-36 OR RAND-36

#6: (S1 OR S2) AND (S3 OR S4) AND S5

#### 6.6 PsycINFO

Limits: Date filter (2000-2020), English language, Human participants, Peer Reviewed Journal

#1 All Fields: "intensive care" or "critical care" or "critical illness" or "Respiratory Distress Syndrome" or Sepsis or "ICU"

#2 Text Word: elderly or "older adult\*" or "geriatr\*" or "dement\*" or "Alzheimer\*" or "parkinson\*"

#3 All Fields: "quality of life" or EuroQol or Nottingham Health Profile or NHP or SF-36 OR RAND-36
